# Supplementary material for: Toxicities and outcomes of 616 ibrutinib-treated patients in the United States: a real-world analysis
Source: PubMed Central journal article supplement — Haematologica. 2018 Feb 1;103(5):874–9. doi: 10.3324/haematol.2017.182907 (PMC5927982; doi:10.3324/haematol.2017.182907), 2018-05
Supplement: 2017_182907-Disclosures_and_Contributions.pdf [file 2017_182907-Disclosures_and_Contributions.pdf]

Haematologica  
HAEMATOL/2017/182907  
Version 3

Toxicities and outcomes of 621 ibrutinib-treated chronic lymphocytic leukemia patients in the United States: a real-world analysis

Anthony R Mato, Chadi Nabhan, Meghan C. Thompson, Nicole Lamanna, Danielle M. Brander, Brian Hill, Christina Howlett, Alan Skarbnik, Bruce D. Cheson, Clive Zent, Jeffrey Pu, Pavel Kiselev, Andre Goy, David Claxton, Krista Isaack, Kaitlin H. Kennard, Colleen Timlin, Daniel Landsburg, Allison Winter, Sunita D. Nasta, Spencer H. Bachow, Stephen J. Schuster, Colleen Dorsey, Jakub Svoboda, Paul Barr, and Chaitra S. Ujjani

Disclosures: This work is unfunded. The lead author works with several industry partners on clinical research: TG Therapeutics, Abbvie, Acerta, Pharmacyclics, Regeneron, DTRM Pharma, Portola. The lead author has consultancy to declare with TG Therapeutics, Abbvie, Johnson and Johnson and Celgene. No addition disclosures at this time.

Contributions: A.M. Designed research, performed research, analyzed data, wrote the paper. B.T.H. Performed research, wrote/edited the paper. N.L. Performed research, wrote/edited the paper. P.M.B. Performed research, wrote/edited the paper. C.S.U. Performed research, wrote/edited the paper. D.M.B. Performed research, wrote/edited the paper. C.H. Performed research, wrote/edited the paper. A.P.S. Performed research, wrote/edited the paper. B.D.C. Performed research, wrote/edited the paper. C.S.Z. Performed research, wrote/edited the paper. J.J.P. Performed research, wrote/edited the paper. P.K. Performed research, analyzed data. K.F. Performed research, wrote/edited the paper. J.L. Performed research, wrote/edited the paper. S.H.B. Performed research A.M.W. Performed research, wrote/edited the paper. A.C. Performed research, wrote/edited the paper. D.F.C. Performed research, wrote/edited the paper. A.G. Performed research, wrote/edited the paper. C.D. Performed research, wrote/edited the paper. K.I. Performed research, wrote/edited the paper. K.H.K. Performed research, wrote/edited the paper. C.T. Performed research, wrote/edited the paper. C.D. Performed research, wrote/edited the paper. S.D.N. Performed research, wrote/edited the paper. D.J.L. Performed research, wrote/edited the paper. M.T. Performed research, wrote/edited the paper. J.S. Performed research, wrote/edited the paper. S.J.S. Performed research, wrote/edited the paper. C.N. Designed research, performed research, analyzed data, wrote the paper.
